# Supplementary material for: Screening for crystalline salts via mechanochemistry
Source: Royal Society of Chemistry journal article supplement (doi:10.1039/b512626f), 2005-11-21
Supplement: b512626f.pdf [file b512626f.pdf]

## # Supplementary Material (ESI) for Chemical Communications

# This journal is © The Royal Society of Chemistry 2005

Electronic Supplementary Information for:

"Screening for Crystalline Salts via Mechanochemistry"

A. V. Trask, D. A. Haynes, W. D. S. Motherwell and W. Jones.

Literature references for all CSD crystal structures in manuscript text

| CSD Reference Code | Description                     | Literature Reference                                                                                                                                   |
|--------------------|---------------------------------|--------------------------------------------------------------------------------------------------------------------------------------------------------|
| AMXBPM10           | T free base                     | T. F. Koetzle and G. J. B. Williams. <i>J. Am. Chem. Soc.</i> , 1976, <b>98</b> , 2074.                                                                |
| MUFMAB             | P free base                     | V. Sethuraman and P. T. Muthiah. <i>Acta Crystallogr.</i> , 2002, <b>E58</b> , o817.                                                                   |
| TMPFOR             | T:formate                       | B. Umadevi, P. Prabakaran and P. T. Muthiah. <i>Acta Crystallogr.</i> , 2002, <b>C58</b> , o510.                                                       |
| FUWVAU             | T:acetate                       | R. F. Bryan, R. C. Haltiwanger and M. K. Woode. <i>Acta Crystallogr.</i> , 1987, <b>C43</b> , 2412.                                                    |
| QIKDIX             | T:maleate                       | P. Prabakaran, J. J. Robert, P. T. Muthiah, G. Bocelli and L. Righi. <i>Acta Crystallogr.</i> , 2001, <b>C57</b> , 459.                                |
| CACBOY             | T:glutarate                     | J. J. Robert, S. B. Raj and P. T. Muthiah. <i>Acta Crystallogr.</i> , 2001, <b>E57</b> , o1206.                                                        |
| MIFWUT             | T:salicylate (methanol solvate) | P. Panneerselvam, N. Stanley and P. T. Muthiah. <i>Acta Crystallogr.</i> , 2002, <b>E58</b> , o180.                                                    |
| UHAYIL             | P:formate                       | N. Stanley, V. Sethuraman, P. T. Muthiah, P. Luger and M. Weber. <i>Cryst. Growth Des.</i> , 2002, <b>2</b> , 631.                                     |
| CIVDIU             | P:acetate (monohydrate)         | P. K. Bryant, J. Colby, R. G. Jenks, P. R. Lowe and C. H. Schwalbe. <i>Acta Crystallogr.</i> , 1984, <b>A40</b> , C79.                                 |
| ULAXOU             | P:maleate                       | V. Sethuraman, N. Stanley, P. T. Muthiah, W. S. Sheldrick, M. Winter, P. Luger and M. Weber. <i>Cryst. Growth Des.</i> , 2003, <b>3</b> , 823.         |
| ULAXIO             | P:fumarate                      | V. Sethuraman, N. Stanley, P. T. Muthiah, W. S. Sheldrick, M. Winter, P. Luger and M. Weber. <i>Cryst. Growth Des.</i> , 2003, <b>3</b> , 823.         |
| ULAYAH             | P:succinate                     | V. Sethuraman, N. Stanley, P. T. Muthiah, W. S. Sheldrick, M. Winter, P. Luger and M. Weber. <i>Cryst. Growth Des.</i> , 2003, <b>3</b> , 823.         |
| UHAYEH             | P:glutarate                     | N. Stanley, V. Sethuraman, P. T. Muthiah, P. Luger and M. Weber. <i>Cryst. Growth Des.</i> , 2002, <b>2</b> , 631.                                     |
| CIVDOA             | P:salicylate                    | P. K. Bryant, J. Colby, R. G. Jenks, P. R. Lowe and C. H. Schwalbe. <i>Acta Crystallogr.</i> , 1984, <b>A40</b> , C79.                                 |
| MALIAC11           | maleic acid                     | M. N. G. James and G. J. B. Williams. <i>Acta Crystallogr.</i> , 1974, <b>B30</b> , 1249.                                                              |
| SUCACB06           | succinic acid                   | I. M. Dodd, S. J. Maginn, M. M. Harding and R. J. Davey. Private Communication to CCDC. See <a href="http://www.ccdc.cam.ac.uk">www.ccdc.cam.ac.uk</a> |

Overlays of all PXRD patterns from 'neat grinding' and 'solvent-drop grinding' experiments involving T and P.

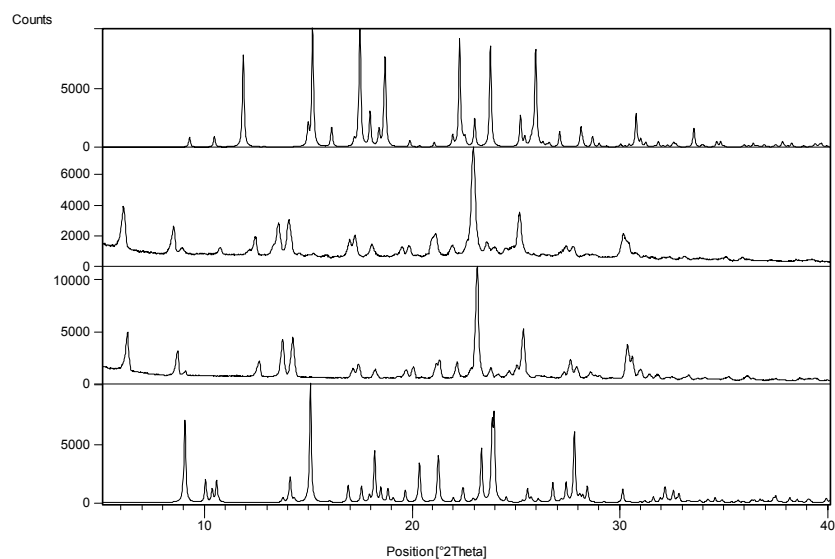

Top to bottom: T, simulated from CSD AMXBPM10; Neat grinding of T with formic acid; Methanol solvent-drop grinding of T with formic acid; T:formate simulated from CSD TMPFOR01

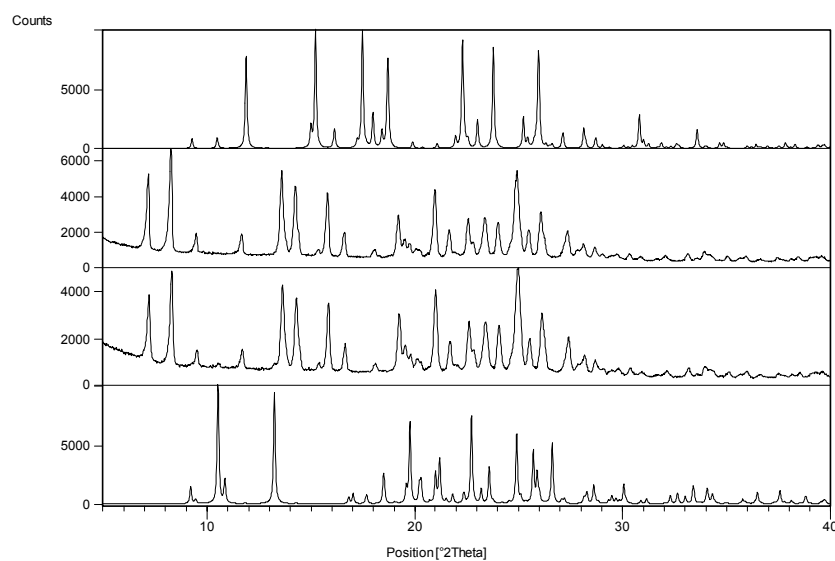

Top to bottom: T, simulated from CSD AMXBPM10; Neat grinding of T with acetic acid; Methanol solvent-drop grinding of T with acetic acid; T:acetate simulated from CSD FUWVAU

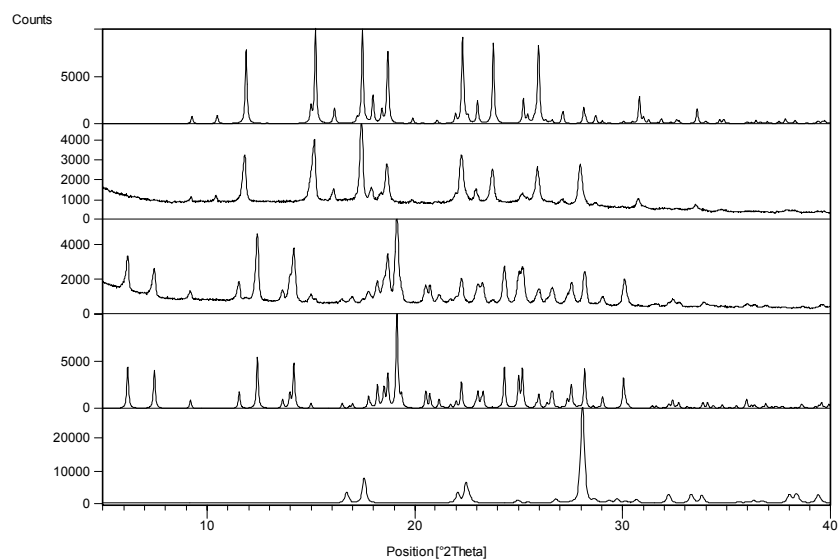

Top to bottom: **T**, simulated from CSD AMXBPM10; Neat grinding of **T** with maleic acid; Methanol solvent-drop grinding of **T** with maleic acid; **T**:maleate simulated from CSD QIKDIX; Maleic acid, simulated from CSD MALIAC11

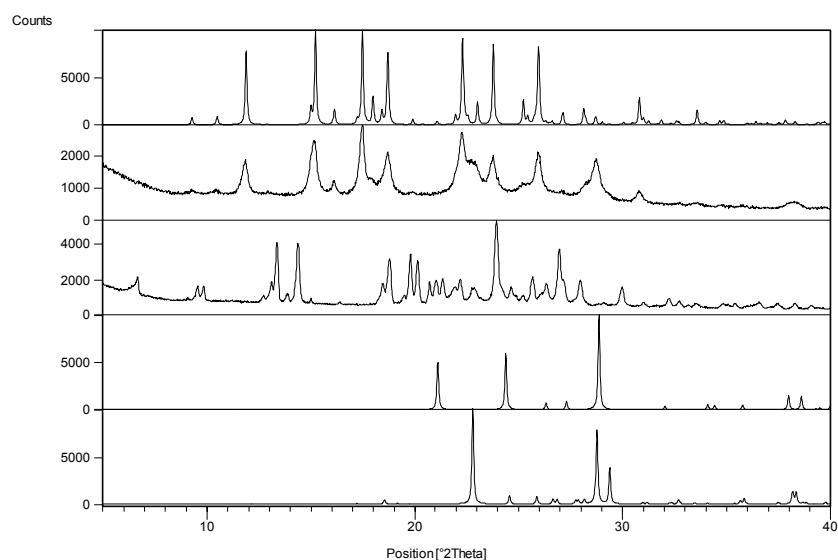

Top to bottom: **T**, simulated from CSD AMXBPM10; Neat grinding of **T** with fumaric acid; Methanol solvent-drop grinding of **T** with fumaric acid; fumaric acid beta polymorph, simulated from CSD FUMAAC01; Fumaric acid alpha polymorph, simulated from CSD FUMAAC

# Supplementary Material (ESI) for Chemical Communications

# This journal is © The Royal Society of Chemistry 2005

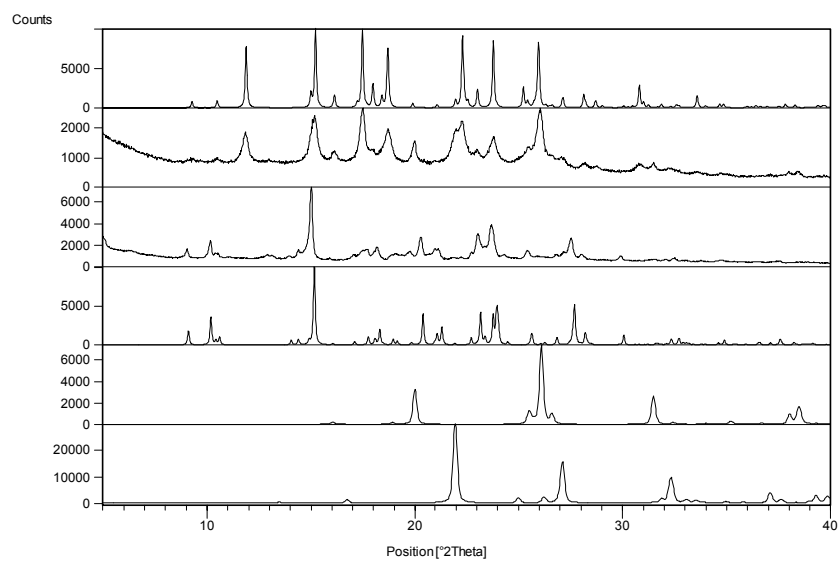

Top to bottom: **T**, simulated from CSD AMXBPM10; Neat grinding of **T** with succinic acid; Methanol solvent-drop grinding of **T** with succinic acid; **T**:succinate simulated from crystal structure data obtained in this study (CIF available as ESI); Succinic acid beta polymorph, simulated from CSD SUCACB06; Succinic acid alpha polymorph, simulated from CSD SUCACB07

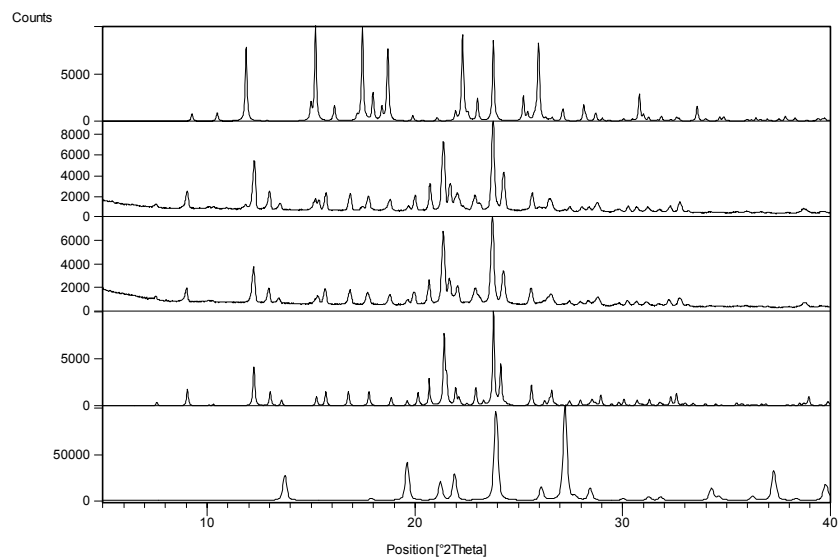

Top to bottom: **T**, simulated from CSD AMXBPM10; Neat grinding of **T** with glutaric acid; Methanol solvent-drop grinding of **T** with glutaric acid; **T**:glutarate simulated from CSD CACBOY; Glutaric acid beta polymorph, simulated from CSD GLURAC04

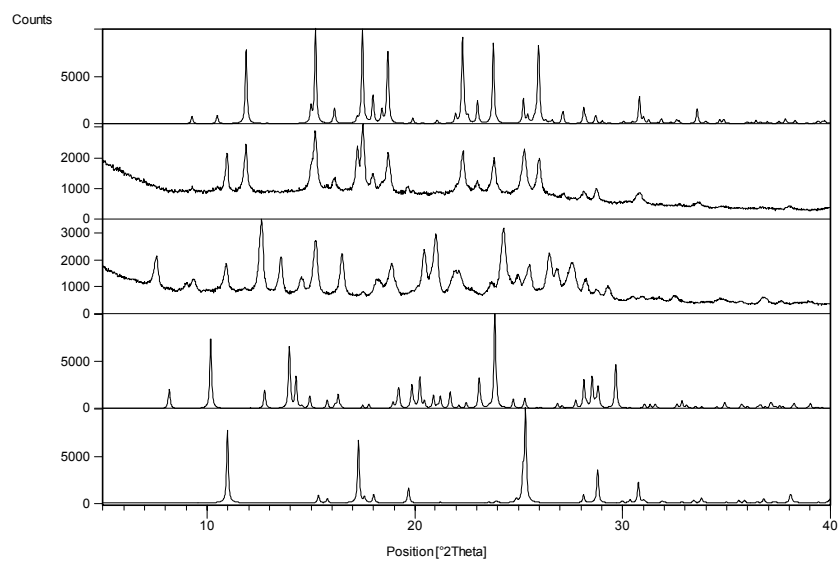

Top to bottom: **T**, simulated from CSD AMXBPM10; Neat grinding of **T** with salicylic acid; Methanol solvent-drop grinding of **T** with salicylic acid; **T**:salicylate simulated from CSD MIFWUT; Salicylic acid simulated from CSD SALIAC

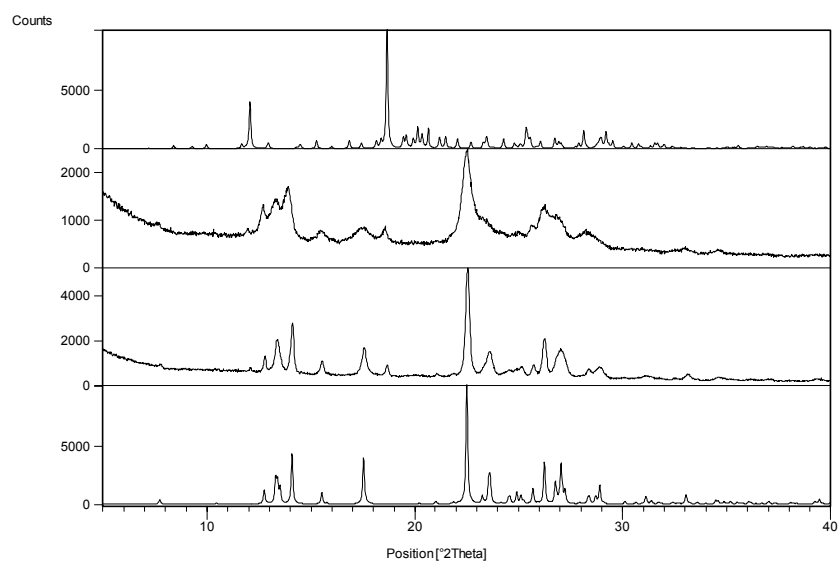

Top to bottom: **P**, simulated from CSD MUFMAB; Neat grinding of **P** with formic acid; Methanol solvent-drop grinding of **P** with formic acid; **P**:formate simulated from CSD UHAYIL

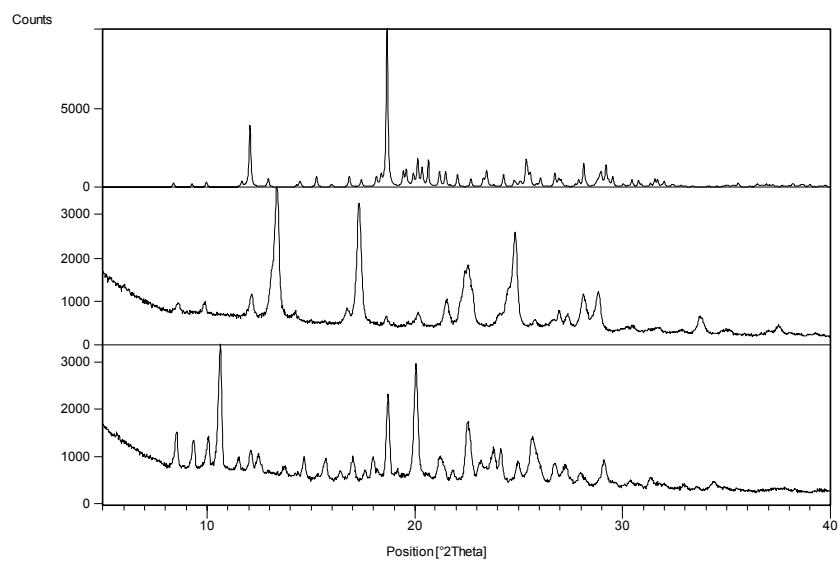

Top to bottom: **P**, simulated from CSD MUFMAB; Neat grinding of **P** with acetic acid; Methanol solvent-drop grinding of **P** with acetic acid

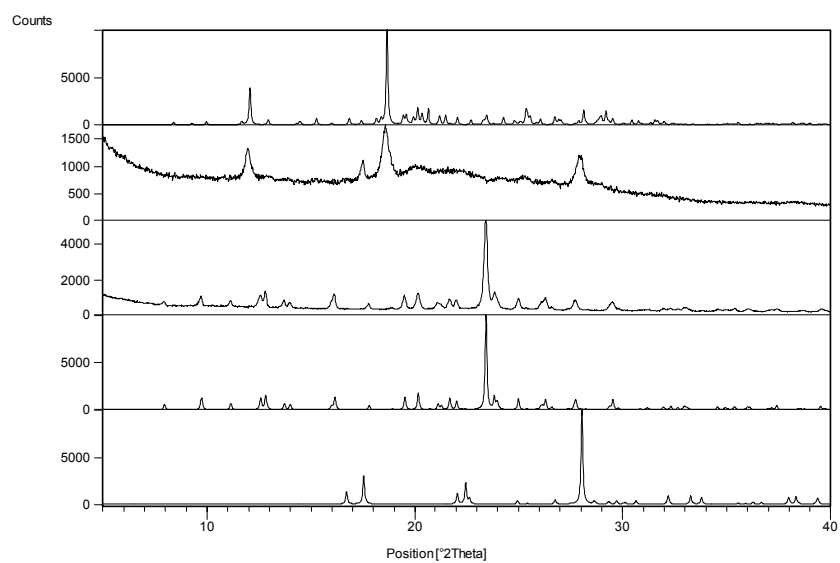

Top to bottom: **P**, simulated from CSD MUFMAB; Neat grinding of **P** with maleic acid; Methanol solvent-drop grinding of **P** with maleic acid; **P**:maleate simulated from CSD ULAXOU; Maleic acid simulated from CSD MALIAC11

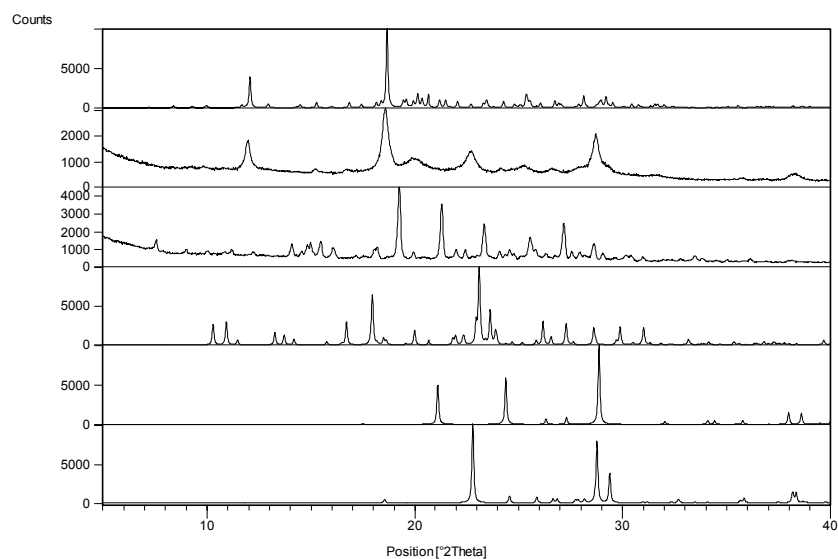

Top to bottom: **P**, simulated from CSD MUFMAB; Neat grinding of **P** with fumaric acid; Methanol solvent-drop grinding of **P** with fumaric acid; **P**:fumarate simulated from CSD ULAXIO; Fumaric acid beta polymorph simulated from CSD FUMAAC01; Fumaric acid alpha polymorph simulated from CSD FUMAAC

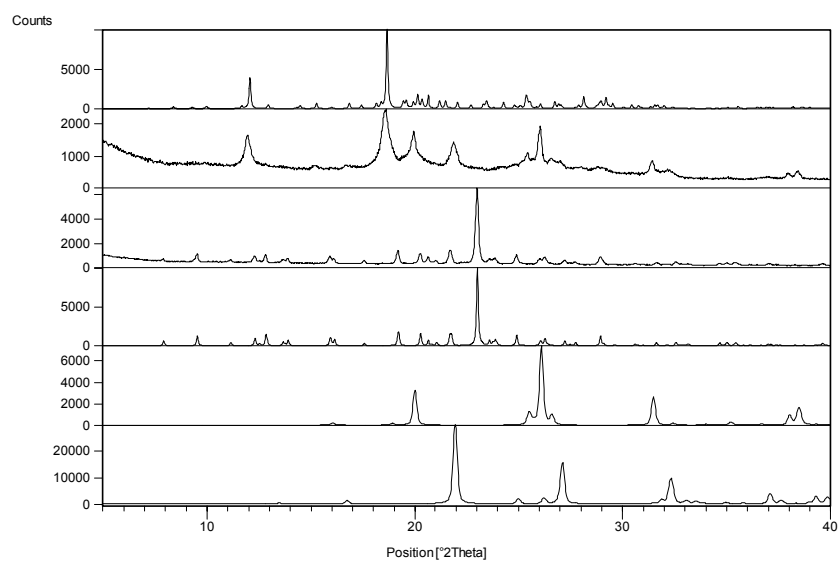

Top to bottom: **P**, simulated from CSD MUFMAB; Neat grinding of **P** with succinic acid; Methanol solvent-drop grinding of **P** with succinic acid; **P**:succinate simulated from CSD ULAYAH; Succinic acid beta polymorph simulated from CSD SUCACB06; Succinic acid alpha polymorph simulated from CSD SUCACB07

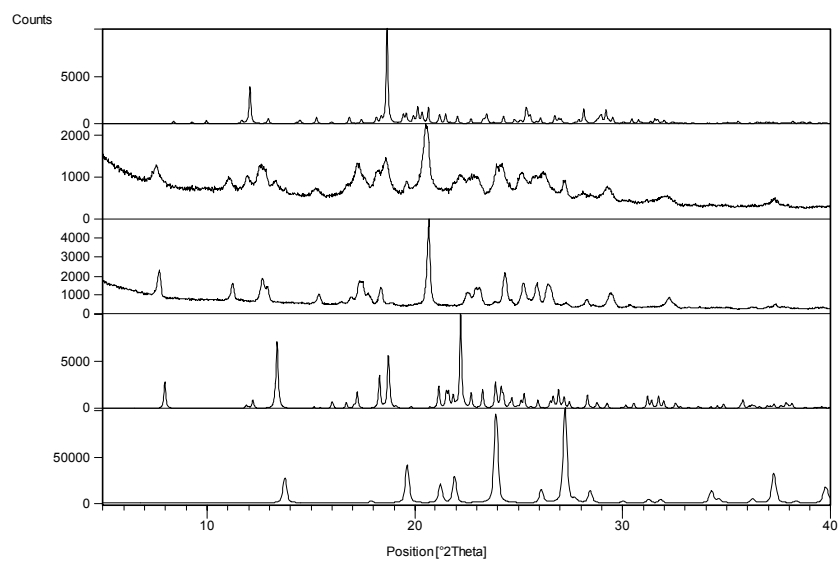

Top to bottom: **P**, simulated from CSD MUFMAB; Neat grinding of **P** with glutaric acid; Methanol solvent-drop grinding of **P** with glutaric acid; **P**:glutarate simulated from CSD UHAYEH; Glutaric acid simulated from CSD GLURAC04

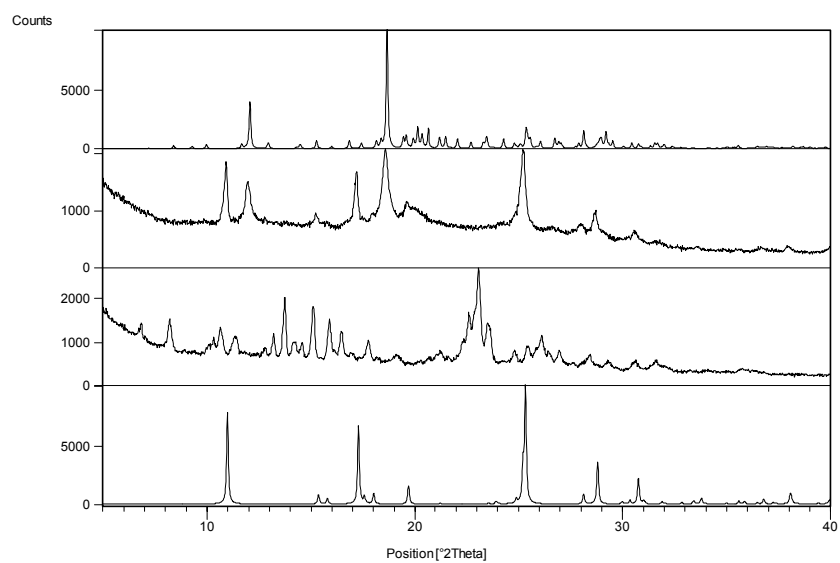

Top to bottom: **P**, simulated from CSD MUFMAB; Neat grinding of **P** with salicylic acid; Methanol solvent-drop grinding of **P** with salicylic acid; Salicylic acid simulated from CSD SALIAC
